# Supplementary material for: Photocatalytic Performance and Degradation Pathway of Rhodamine B with TS-1/C3N4 Composite under Visible Light
Source: Nanomaterials (Basel). 2020 Apr 15;10(4):756. doi: 10.3390/nano10040756 (PMC7221997; doi:10.3390/nano10040756)
Supplement: Supplementary file 1 [file nanomaterials-10-00756-s001.pdf]

## Photocatalytic Performance and Degradation Pathway of Rhodamine B with TS-1/C<sub>3</sub>N<sub>4</sub> Composite under Visible Light

Jingjing Yang<sup>1</sup>, Hongqing Zhu<sup>2</sup>, Yuan Peng<sup>3</sup>, Pengxi Li<sup>1</sup>, Shuyan Chen<sup>1</sup>, Bing Yang<sup>1,\*</sup> and Jinzhong Zhang<sup>2,\*</sup>

<sup>1</sup> Department of Environment and Quality Test, Chongqing Chemical Industry Vocational College, Chongqing 401228, China; hahajing1229@163.com (J.Y.); lipengxi616@163.com (P.L.); sychentsinghua@126.com (S.C.)

<sup>2</sup> College of Resources and Environment, Southwest University, Chongqing 400715, China; hongqzhu@yeah.net

<sup>3</sup> College of Materials Science and Engineering, Yangtze Normal University, Chongqing 408100, China; ypeng@yznu.edu.cn

\* Correspondence: hyjxyangbing@163.com (B.Y.); jzhzhang@swu.edu.cn (J.Z.)

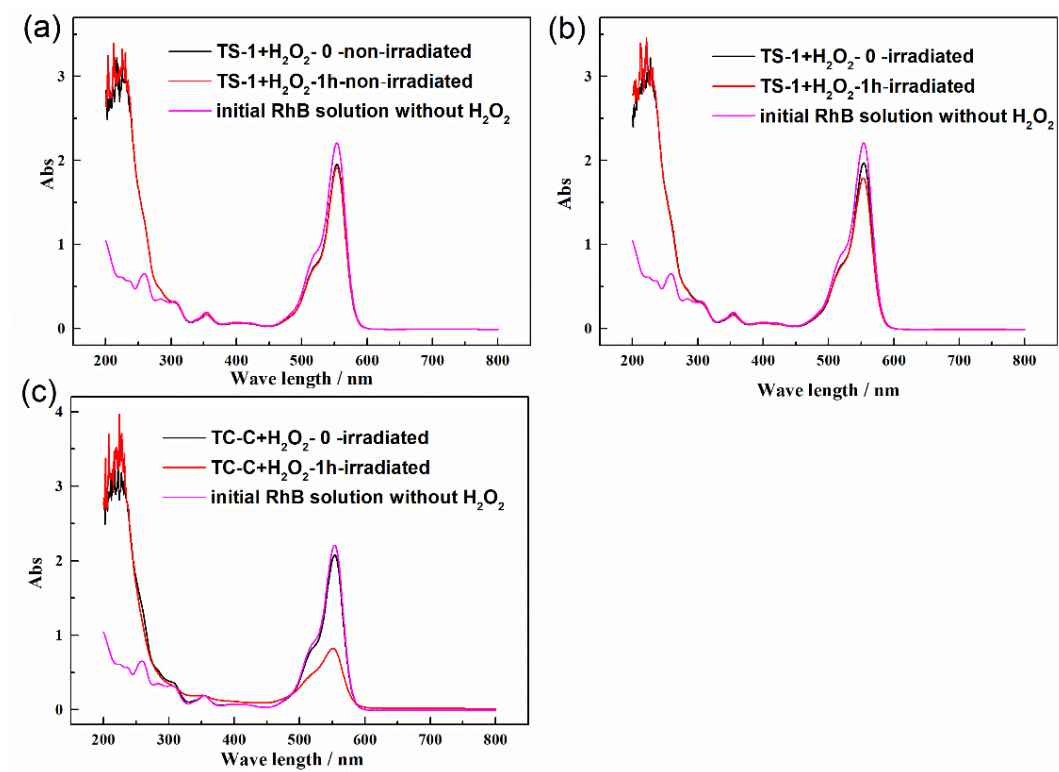

Figure S1. UV-vis adsorption spectral changes for the RhB solution in different conditions (a) TS-1+H<sub>2</sub>O<sub>2</sub>-unirradiate; (b) TS-1+H<sub>2</sub>O<sub>2</sub>-irradiate; (c) TC-C+H<sub>2</sub>O<sub>2</sub>-unirradiate.

In order to further study the effect of H<sub>2</sub>O<sub>2</sub> on the reaction process during reaction, the concentration of H<sub>2</sub>O<sub>2</sub> was detected by UV-Vis spectra and the results are shown in Figure S1. The absorption peak of is around 220 nm. It is discovered that the concentration of H<sub>2</sub>O<sub>2</sub> does not decrease before and after reactions irradiated or non-irradiated over TS-1 and H<sub>2</sub>O<sub>2</sub>. But a little bit of an increase was observed over TC-C composite and H<sub>2</sub>O<sub>2</sub> under irradiation.

The possible reasons for this phenomenon are proposed as below. C<sub>3</sub>N<sub>4</sub> can generate e<sup>-</sup> and h<sup>+</sup> under visible light, however the h<sup>+</sup> on valence band (VB) of C<sub>3</sub>N<sub>4</sub> is too weak to oxidize OH<sup>-</sup> to  $\cdot\text{OH}$ . A series of reactions between the H<sub>2</sub>O<sub>2</sub> and other oxidant species are listed as below [1–3].

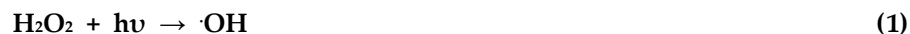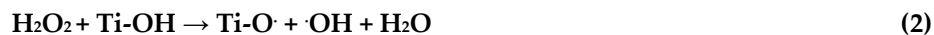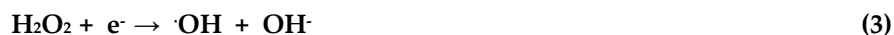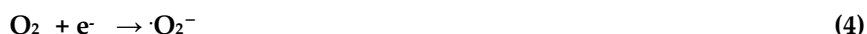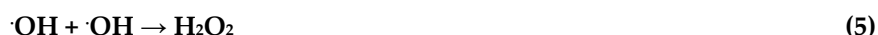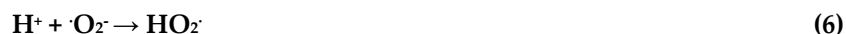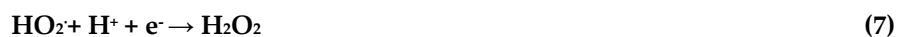

The H<sub>2</sub>O<sub>2</sub> can be activated by visible light or e<sup>-</sup> to decompose to  $\cdot\text{OH}$  (reaction 1 and 3), and can react with Ti-OH to produce  $\cdot\text{OH}$  (reaction 2). Dissolved O<sub>2</sub> in solution is reduced by e<sup>-</sup> to form  $\cdot\text{O}_2^-$  (reaction 4). Highly reactive hydroxyl radicals  $\cdot\text{OH}$  can combine with each other to yield H<sub>2</sub>O<sub>2</sub> (reaction 5). And H<sub>2</sub>O<sub>2</sub> are also produced by reaction (6) and (7). In consequence, H<sub>2</sub>O<sub>2</sub> is consumed in reactions (1) (2) (3) while supplemented by reactions (5) (6) (7). Visible light and active species (h<sup>+</sup> or  $\cdot\text{O}_2^-$  or  $\cdot\text{OH}$ ) can promote RhB degradation to some extent independently. The specific reactions take place in different cases are listed in Table S1.

Table S1 A list of reactions that take place in different cases.

| case                                              | reaction              |
|---------------------------------------------------|-----------------------|
| TS-1+H <sub>2</sub> O <sub>2</sub> non-irradiated | (2)(5)                |
| TS-1+ H <sub>2</sub> O <sub>2</sub> irradiated    | (1)(2)(5)             |
| TC-C+ H <sub>2</sub> O <sub>2</sub> irradiated    | (1)(2)(3)(4)(5)(6)(7) |

For the first case, H<sub>2</sub>O<sub>2</sub> can be activated by Ti-OH in TS-1 to produce  $\cdot\text{OH}$ . Some of  $\cdot\text{OH}$  combined with each other to form H<sub>2</sub>O<sub>2</sub>, and the others react with RhB. From the results of photocatalysis (Figure 7), it is inferred that there is a very small amount of  $\cdot\text{OH}$  to react with RhB, so the concentration of H<sub>2</sub>O<sub>2</sub> changed little during dark reaction for one hour (Figure S1(a)). It is consistent with curves I and II in Figure 7(a). The presence or absence of H<sub>2</sub>O<sub>2</sub> does not affect the degree of RhB concentration reduction (about 20%).

For the second case, TS-1 is not able to generate photo-electrons under visible light, so the circumstance is similar to the first one. It is concluded from Figure S1(b) that the decomposition rate of  $\text{H}_2\text{O}_2$  is little (reaction (1)) under visible light. Compared curve II and IV (Figure 7a), the more decreased concentration in curve IV than of curve II Figure 7a is contributed to the photolysis of visible light.

For the third case, the concentration of  $\text{H}_2\text{O}_2$  has a little bit of an increase after irradiation for one hour (shown in Figure S1(c)). Although the large number of  $\text{H}_2\text{O}_2$  involved in the reaction resulting in its consumption, it was supplemented by reactions (4), (5), (6). The phenomenon is consisted with the reference reported [2-3].

#### References:

- [1] Zhong, W.; Qiao, T.; Dai, J.; Mao, L.; Xu, Q.; Zou, G.; Liu, X.; Yin, D.; Zhao, F. Visible-light-responsive sulfated vanadium-doped TS-1 with hollow structure: Enhanced photocatalytic activity in selective oxidation of cyclohexane. *J. Catal.* **2015**, *330*, 208–221.
- [2] Cui, Y.; Ding, Z.; Liu, P.; Antonietti, M.; Fu, X.; Wang, X. Metal-free activation of  $\text{H}_2\text{O}_2$  by g-C<sub>3</sub>N<sub>4</sub> under visible light irradiation for the degradation of organic pollutants. *Phys. Chem. Chem. Phys.* **2012**, *14*, 1455–1462.
- [3] Wang, L.; Cao, S.; Guo, K.; Wu, Z.; Ma, Z.; Piao, L. Simultaneous hydrogen and peroxide production by photocatalytic water splitting. *Chinese J. Catal.* **2019**, *40*, 470–475.
